# Supplementary material for: Paternal Uniparental Isodisomy of Chromosome 2 in a Patient with CNGA3-Associated Autosomal Recessive Achromatopsia
Source: MDPI journal article supplement (doi:10.3390/ijms22157842), 2021-07-22
Supplement: s1 [file s1]

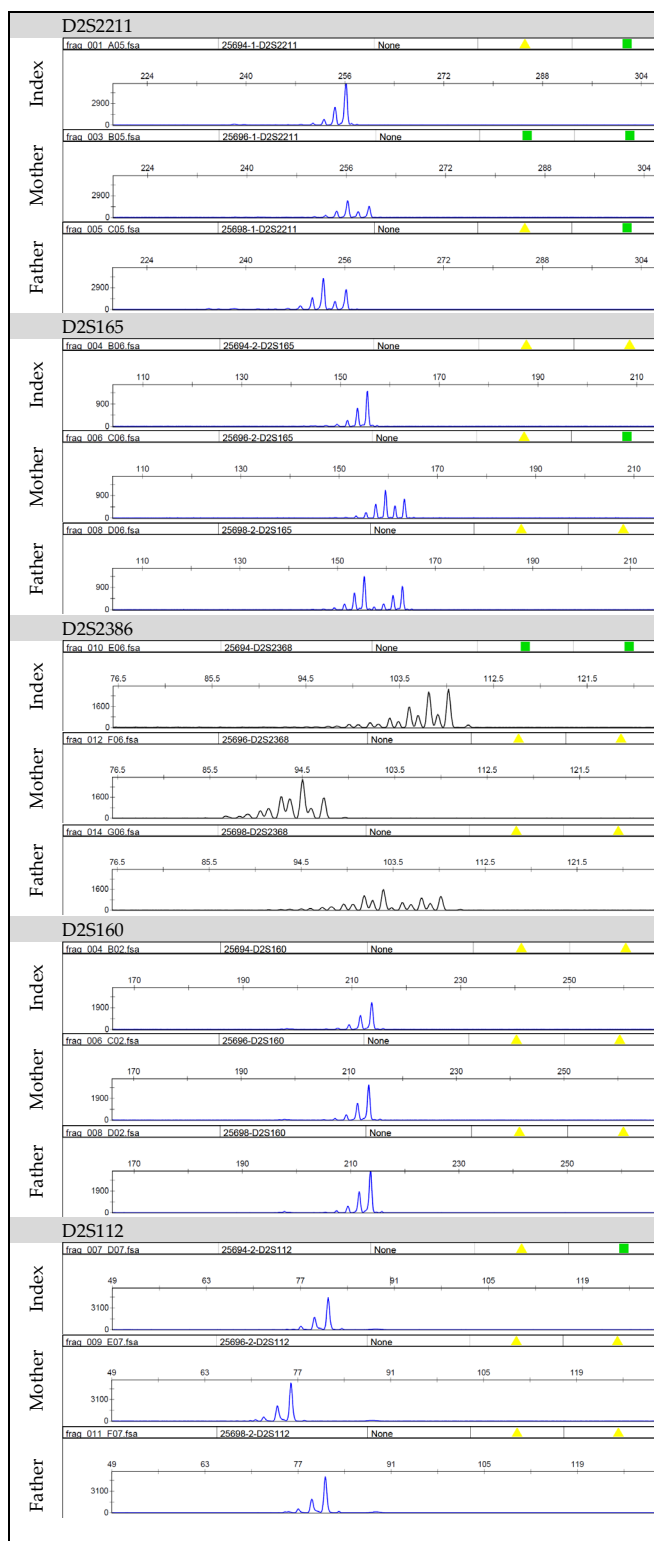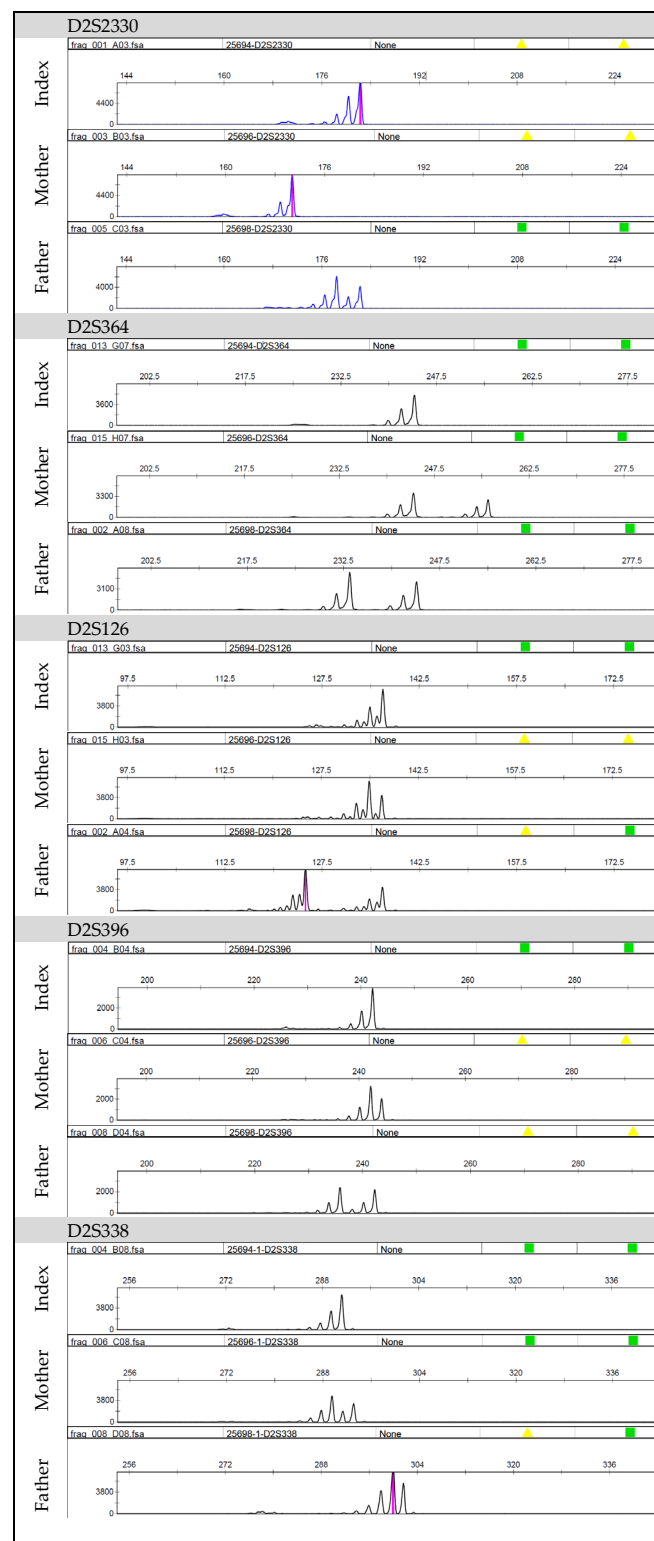

**Supplementary Figure S1:** Microsatellite marker fragment sizing for human chromosome 2.

**Supplementary Table S1:** Microsatellite marker typing for human chromosome 2.

|                  | D2S2211       |          | D2S165   |          | D2S2386  |          | D2S160        |          | D2S112   |          |
|------------------|---------------|----------|----------|----------|----------|----------|---------------|----------|----------|----------|
|                  | Allele 1      | Allele 2 | Allele 1 | Allele 2 | Allele 1 | Allele 2 | Allele 1      | Allele 2 | Allele 1 | Allele 2 |
| #25694<br>Index  | 256           | 256      | 155      | 155      | 108      | 108      | 213           | 213      | 81       | 81       |
| #25696<br>Mother | 256           | 259      | 159      | 163      | 94       | 96       | 213           | 213      | 75       | 75       |
| #26968<br>Father | 252           | 256      | 155      | 163      | 102      | 108      | 213           | 213      | 81       | 81       |
|                  | uninformative |          |          |          |          |          | uninformative |          |          |          |

|                  | D2S2330  |          | D2S364        |          | D2S126        |          | D2S396        |          | D2S338   |          |
|------------------|----------|----------|---------------|----------|---------------|----------|---------------|----------|----------|----------|
|                  | Allele 1 | Allele 2 | Allele 1      | Allele 2 | Allele 1      | Allele 2 | Allele 1      | Allele 2 | Allele 1 | Allele 2 |
| #25694<br>Index  | 182      | 182      | 244           | 244      | 136           | 136      | 242           | 242      | 291      | 291      |
| #25696<br>Mother | 168      | 170      | 244           | 255      | 134           | 138      | 242           | 244      | 289      | 293      |
| #26968<br>Father | 178      | 182      | 233           | 244      | 124           | 136      | 235           | 242      | 291      | 293      |
|                  |          |          | uninformative |          | uninformative |          | uninformative |          |          |          |

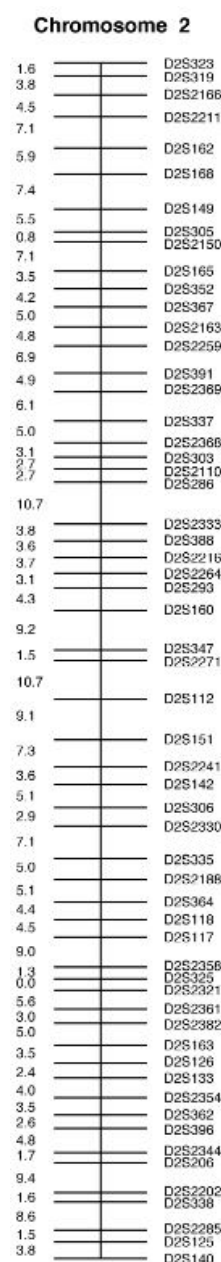

**Supplementary Figure S2:** Microsatellite markers and physical distances of the ABI PRISM® Linkage Mapping Set (Thermo Fisher Scientific; [https://genome.med.harvard.edu/documents/genotyping/Human\\_Linkage.pdf](https://genome.med.harvard.edu/documents/genotyping/Human_Linkage.pdf)).
